# Supplementary material for: Causal Effect of Adiposity Measures on Blood Pressure Traits in 2 Urban Swedish Cohorts: A Mendelian Randomization Study
Source: PubMed Central journal article supplement — J Am Heart Assoc. 2021 Jun 14;10(13):e020405. doi: 10.1161/JAHA.120.020405 (PMC8403279; doi:10.1161/jaha.120.020405), 2021-06-14
Supplement: JAH3-10-e020405-s001.pdf [file JAH3-10-e020405-s001.pdf]

# SUPPLEMENTARY MATERIAL

# Supplementary Material

|                                                                               |   |
|-------------------------------------------------------------------------------|---|
| Regeneron Genetics Center Banner Author List and Contribution Statements..... | 1 |
| Supplementary Tables.....                                                     | 2 |
| Supplementary Figures .....                                                   | 7 |

## Regeneron Genetics Center Banner Author List and Contribution Statements

All authors/contributors are listed in alphabetical order.

### RGC Management and Leadership Team

Goncalo Abecasis, Ph.D., Aris Baras, M.D., Michael Cantor, M.D., Giovanni Coppola, M.D., Andrew Deubler, Aris Economides, Ph.D., Luca A. Lotta, M.D., Ph.D., John D. Overton, Ph.D., Jeffrey G. Reid, Ph.D., Alan Shuldiner, M.D.

Contribution: All authors contributed to securing funding, study design and oversight. All authors reviewed the final version of the manuscript.

### Sequencing and Lab Operations

Christina Beechert, Caitlin Forsythe, M.S., Erin D. Fuller, Zhenhua Gu, M.S., Michael Lattari, Alexander Lopez, M.S., John D. Overton, Ph.D., Thomas D. Schleicher, M.S., Maria Sotiropoulos Padilla, M.S., Louis Widom, Sarah E. Wolf, M.S., Manasi Pradhan, M.S., Kia Manoochehri, Ricardo H. Ulloa.

Contribution: C.B., C.F., A.L., and J.D.O. performed and are responsible for sample genotyping. C.B, C.F., E.D.F., M.L., M.S.P., L.W., S.E.W., A.L., and J.D.O. performed and are responsible for exome sequencing. T.D.S., Z.G., A.L., and J.D.O. conceived and are responsible for laboratory automation. M.P., K.M., R.U., and J.D.O are responsible for sample tracking and the library information management system.

### Genome Informatics

Xiaodong Bai, Ph.D., Suganthi Balasubramanian, Ph.D., Andrew Blumenfeld, Boris Boutkov, Ph.D., Gisu Eom, Lukas Habegger, Ph.D., Alicia Hawes, B.S., Shareef Khalid, Olga Krasheninina, M.S., Rouel Lanche, Adam J. Mansfield, B.A., Evan K. Maxwell, Ph.D., Mrunali Nafde, Sean O’Keeffe, M.S., Max Orelus, Razvan Panea, Ph.D., Tommy Polanco, B.A., Ayesha Rasool, M.S., Jeffrey G. Reid, Ph.D., William Salerno, Ph.D., Jeffrey C. Staples, Ph.D.

Contribution: X.B., A.H., O.K., A.M., S.O., R.P., T.P., A.R., W.S. and J.G.R. performed and are responsible for the compute logistics, analysis and infrastructure needed to produce exome and genotype data. G.E., M.O., M.N. and J.G.R. provided compute infrastructure development and operational support. S.B., S.K., and J.G.R. provide variant and gene annotations and their functional interpretation of variants. E.M., J.S., R.L., B.B., A.B., L.H., J.G.R. conceived and are responsible for creating, developing, and deploying analysis platforms and computational methods for analyzing genomic data.

### Research Program Management

Marcus B. Jones, Ph.D., Lyndon J. Mitnaul, Ph.D.

Contribution: All authors contributed to the management and coordination of all research activities, planning and execution. All authors contributed to the review process for the final version of the manuscript.

## Supplementary Tables

Table S1 Characteristics of the MPP and MDC cohorts

|                                          | MPP<br>(n=9,367) | MDC<br>(n=29,295) |
|------------------------------------------|------------------|-------------------|
|                                          | <i>Mean±SD/%</i> | <i>Mean±SD/%</i>  |
| Age, yrs                                 | 46.8±6.3         | 58.0±7.6          |
| Sex, % Male                              | 55.4             | 39.7              |
| BMI, kg/m <sup>2</sup>                   | 24.3±3.4         | 25.8±4.0          |
| Waist to Hip Ratio                       | 0.92±0.09        | 0.86±0.15         |
| Body Fat, %                              | -                | 26.8±7.0          |
| baseline Systolic Blood Pressure, mmHg   | 126.5±14.2       | 141.1±20.0        |
| baseline Diastolic Blood Pressure, mmHg  | 85.2±8.7         | 85.6±10.4         |
| follow-up Systolic Blood Pressure, mmHg  | 144.9±20.0       | -                 |
| follow-up Diastolic Blood Pressure, mmHg | 83.6±10.5        | -                 |
| Diabetes at baseline, %                  | 3.8              | 17.4              |
| Smoke, % smokers                         | 32.7             | 62.1              |
| baseline Hypertensive, %                 | 34.2             | 61.3              |
| follow-up Hypertensive, %                | 63.3             | -                 |

Legend: BMI, Body Mass index; MPP, Malmö Preventive Project; MDC, Malmö Diet and Cancer

Table S2 Adiposity measurements in the two cohorts.

| <b>Adiposity trait</b> | <b>Measurement</b>                                                                                                                                                      | <b>MDC</b> | <b>MPP</b> |
|------------------------|-------------------------------------------------------------------------------------------------------------------------------------------------------------------------|------------|------------|
| BMI                    | weight (kg)/ height <sup>2</sup> (m <sup>2</sup> ); height and weight measured by trained nurses                                                                        | Yes        | Yes        |
| WHR                    | waist/hip; i) waist measured between lowest rib margin and iliac crest; ii) hip circumference                                                                           | Yes        | Yes        |
| Body fat               | Body fat estimated through Bioelectrical Impedance Analyzer (BIA) according to manufacturer's algorithm (BIA 103, JRL systems, single-frequency analyzer, Detroit, USA) | Yes        | No         |

Legend: BMI, Body Mass Index; WHR, Waist to hip ratio; MPP, Malmö Preventive Project; MDC, Malmö Diet and Cancer.

Table S3. Information about the studies from which weights for GRSs were derived

| <b>GRS</b>             | <b>Trait</b>                                                                                           | <b>Study</b>             | <b>Sample size</b>                                           | <b>Ethnic group</b>                |
|------------------------|--------------------------------------------------------------------------------------------------------|--------------------------|--------------------------------------------------------------|------------------------------------|
| GRS-BMI <sub>565</sub> | Body mass index                                                                                        | Pulit et al 2019         | n= 694,649<br>(UKBiobank:<br>n=484,563,<br>GIANT: n=210,086) | European                           |
| GRS-WHR <sub>324</sub> | Waist to hip ratio                                                                                     | Pulit et al 2019         | 694,649 (UKBiobank,<br>n=484,563+<br>GIANT, n=210,086)       | European                           |
| GRS-VAT <sub>208</sub> | Predicted visceral adiposity trait (VAT)                                                               | Karlsson et al 2019      | UKBiobank,<br>n=325,153                                      | White and British ancestry         |
| GRS-BF <sub>81</sub>   | Body fat mass; measured with bio-electrical impedance (BIA) and dual energy X-ray absorptiometry (DXA) | Rask-Andersen et al 2019 | UKBiobank, n=<br>362,499                                     | White and British ancestry of UKBB |

Legend: GRS-VAT208, Genetic risk score for Visceral Adipose Tissue based on 208 SNPs; GRS-BF81, Genetic risk score for Body Fat based on 81 SNPs; GRS-WHR324 Genetic Risk Score for Waist Hip Ratio based on 324 SNPs; GRS-BMI565, Genetic Risk Score for Body Mass Index based on 565 SNPs.

Table S4 Association of four GRS with blood pressure traits in MPP (a.) and in MDC (b.)

| a. MPP                 | SBP at baseline (n=9,140)  |                    |                       |                     | DBP at baseline (n=9,140)  |                     |                       |                     |
|------------------------|----------------------------|--------------------|-----------------------|---------------------|----------------------------|---------------------|-----------------------|---------------------|
|                        | Model 1                    |                    | Model 2               |                     | Model 1                    |                     | Model 2               |                     |
|                        | Beta (95% CI)              | p-value            | Beta (95% CI)         |                     | Beta (95% CI)              | p-value             | Beta (95% CI)         | p-value             |
| GRS-BMI <sub>565</sub> | 0.231 (0.131,0.331)        | 3.4E <sup>-6</sup> | 0.233 (0.133,0.333)   | 4.2E <sup>-6</sup>  | 0.251 (0.153,0.349)        | 4.0E <sup>-7</sup>  | 0.257 (0.157,0.357)   | 3.0E <sup>-7</sup>  |
| GRS-WHR <sub>324</sub> | 0.426 (0.175,0.677)        | 0.001              | 0.288 (0.123,0.453)   | 0.001               | 0.529 (0.286,0.772)        | 3.24E <sup>-5</sup> | 0.367 (0.202,0.532)   | 1.4E <sup>-5</sup>  |
| GRS-BF <sub>81</sub>   | 0.247 (-0.07,0.563)        | 0.125              | 0.241 (-0.07,0.552)   | 0.130               | 0.275 (-0.036,0.586)       | 0.084               | 0.269 (-0.017,0.576)  | 0.087               |
| GRS-VAT <sub>208</sub> | 0.326 (0.173,0.479)        | 3.1E <sup>-5</sup> | 0.336 (0.187,0.485)   | 9.7E <sup>-6</sup>  | 0.270 (0.162,0.378)        | 0.001               | 0.296 (0.149,0.443)   | 8.3E <sup>-5</sup>  |
|                        | SBP at follow-up (n=9,041) |                    |                       |                     | DBP at follow-up (n=9,041) |                     |                       |                     |
| GRS-BMI <sub>565</sub> | 0.163 (0.060,0.260)        | 0.002              | 0.158 (0.058,0.258)   | 0.002               | 0.178 (0.078,0.278)        | 0.001               | 0.172 (0.072,0.272)   | 0.001               |
| GRS-WHR <sub>324</sub> | 0.083 (-0.146,0.312)       | 0.475              | 0.048 (-0.050,0.196)  | 0.053               | 0.061 (-0.089,0.211)       | 0.431               | 0.055 (-0.098,0.208)  | 0.477               |
| GRS-BF <sub>81</sub>   | -0.166 (-0.497,0.165)      | 0.327              | -0.161 (-0.482,0.160) | 0.325               | -0.034 (-0.353,0.285)      | 0.834               | -0.033 (-0.343,0.277) | 0.834               |
| GRS-VAT <sub>208</sub> | 0.128 (-0.029,0.285)       | 0.110              | 0.122 (-0.042,0.286)  | 0.111               | 0.200 (0.043,0.357)        | 0.012               | 0.190 (0.04,0.339)    | 0.012               |
| b. MDC                 | SBP at baseline (n=29,247) |                    |                       |                     | DBP at baseline (n=29,247) |                     |                       |                     |
| GRS-BMI <sub>565</sub> | 0.166 (0.104,0.222)        | 4.0E <sup>-8</sup> | 0.205 (0.145,0.265)   | 8.3E <sup>-12</sup> | 0.239 (0.18,0.298)         | 4.4E <sup>-16</sup> | 0.248 (0.188,0.308)   | 6.8E <sup>-17</sup> |
| GRS-WHR <sub>324</sub> | 0.620 (0.336,0.940)        | 2.0E <sup>-5</sup> | 0.546 (0.311,0.781)   | 5.7E <sup>-6</sup>  | 0.767 (0.477,1.057)        | 2.5E <sup>-7</sup>  | 0.676 (0.431,0.921)   | 6.0E <sup>-8</sup>  |
| GRS-BF <sub>81</sub>   | 0.129 (0.094,0.164)        | 0.310              | 0.142 (-0.038,0.322)  | 0.305               | 0.311 (0.274,0.348)        | 0.02                | 0.267 (0.089,0.445)   | 0.003               |
| GRS-VAT <sub>208</sub> | 0.182 (0.096,0.268)        | 3.3E <sup>-5</sup> | 0.226 (0.142,0.310)   | 1.6E <sup>-7</sup>  | 0.267(0.183,0.351)         | 7.6E <sup>-10</sup> | 0.284 (0.200,0.368)   | 3.1E <sup>-11</sup> |

Legend:-GRS-VAT<sub>208</sub>, Genetic risk score for Visceral Adipose Tissue based on 208 SNPs; GRS-BF<sub>81</sub>, Genetic risk score for Body Fat based on 81 SNPs; GRS-WHR<sub>324</sub> Genetic Risk Score for Waist Hip Ratio based on 324 SNPs; GRS-BMI<sub>565</sub>, Genetic Risk Score for Body Mass Index based on 565 SNPs; BMI, Body Mass Index; BF, Body Fat; WHR, Waist Hip Ratio. Model 1: raw association (without adjustment); Model 2: the exposure trait was used as the residual from linear regression with age, sex, age<sup>2</sup>, age\*sex.

Table S5 Sensitivity analysis, including in the same model the GRS-BMI<sub>565</sub> and GRS-WHR<sub>324</sub>.

| MDC                                |                  |                     |
|------------------------------------|------------------|---------------------|
| Hypertension Prevalence<br>n=29262 |                  |                     |
|                                    | OR (95% CI)      | p-value             |
| GRS <sub>565</sub> -BMI            | 1.49 (1.32,1.68) | 1.0E <sup>-10</sup> |
| GRS <sub>324</sub> -WHR            | 2.55 (1.51,4.35) | 0.001               |

Legend: GRS-WHR<sub>324</sub> Genetic Risk Score for Waist Hip Ratio based on 324 SNPs; GRS-BMI<sub>565</sub>, Genetic Risk Score for Body Mass Index based on 565 SNPs.

Table S6 Binary Outcome with first step of regression, computed only on control

|                        | Hypertension<br>Prevalence<br>n=9,137 |         | Hypertension<br>Incidence<br>n=5,971 |         |
|------------------------|---------------------------------------|---------|--------------------------------------|---------|
|                        | OR (95% CI)                           | p-value | OR (95% CI)                          | p-value |
| GRS-BMI <sub>565</sub> | 1.59 (1.04,2.03)                      | 0.0002  | 1.42 (1.03,1.96)                     | 0.003   |
| GRS-WHR <sub>324</sub> | 2.49 (1.52,4.08)                      | 0.0003  | 1.10 (0.54,2.25)                     | n.s.    |
| GRS-BF <sub>81</sub>   | 1.64 (0.66,4.06)                      | n.s.    | 0.41 (0.15,1.11)                     | n.s.    |
| GRS-VAT <sub>208</sub> | 2.47 (1.64,3.72)                      | 1.5e-05 | 1.42 (0.89,2.23)                     | 0.01    |

Legend: GRS-VAT<sub>208</sub>, Genetic risk score for Visceral Adipose Tissue based on 208 SNPs; GRS-BF<sub>81</sub>, Genetic risk score for Body Fat based on 81 SNPs; GRS-WHR<sub>324</sub> Genetic Risk Score for Waist Hip Ratio based on 324 SNPs; GRS-BMI<sub>565</sub>, Genetic Risk Score for Body Mass Index based on 565 SNPs; n.s.: not significant; OR, Odd Ratio; CI, Confidence Interval

Table S7 Summarized data analysis

|                        |                        | <b>SBP</b>             |                | <b>DBP</b>             |                |
|------------------------|------------------------|------------------------|----------------|------------------------|----------------|
|                        | <b>Method</b>          | <b>Estimate(95%CI)</b> | <b>p-value</b> | <b>Estimate(95%CI)</b> | <b>p-value</b> |
| GRS-BMI <sub>565</sub> | <b>Weighted median</b> | 1.90(0.09,3.71)        | 0.04           | 2.05(1.15,2.95)        | <0.0001        |
|                        | <b>IVW</b>             | 2.75(1.66,3.85)        | <0.0001        | 2.00(1.45,2.55)        | <0.0001        |
|                        | <b>MR Egger</b>        | 1.79(-1.15,4.73)       | n.s.           | 1.32(-0.15,2.81)       | n.s.           |
| GRS-WHR <sub>324</sub> | <b>Weighted median</b> | 4.67(2.57,7.08)        | <0.0001        | 2.44(1.23,3.65)        | <0.0001        |
|                        | <b>IVW</b>             | 3.18(1.68,4.67)        | <0.0001        | 1.95(1.19,2.71)        | <0.0001        |
|                        | <b>MR Egger</b>        | 4.25(1.68,4.67)        | 0.03           | 2.51(0.54,4.47)        | 0.012          |
| GRS-BF <sub>81</sub>   | <b>Weighted median</b> | 0.19(-0.02,0.40)       | n.s.           | 0.18(-0.04,0.39)       | n.s.           |
|                        | <b>IVW</b>             | 0.08(-0.10,0.25)       | n.s.           | 0.19(-0.01,0.38)       | n.s.           |
|                        | <b>MR Egger</b>        | 0.13(-0.11,0.37)       | n.s.           | 0.12(-0.14,0.38)       | n.s.           |
| GRS-VAT <sub>208</sub> | <b>Weighted median</b> | 0.15(0.05,0.24)        | 0.003          | 0.18(0.08,0.28)        | <0.0001        |
|                        | <b>IVW</b>             | 0.13(0.06,0.20)        | <0.0001        | 0.19(0.12,0.26)        | <0.0001        |
|                        | <b>MR Egger</b>        | 0.13(-0.10,0.36)       | n.s.           | 0.21(-0.03,0.44)       | n.s.           |

Legend: DBP, Diastolic Blood Pressure; GRS-VAT208, Genetic risk score for Visceral Adipose Tissue based on 208 SNPs; GRS-BF81, Genetic risk score for Body Fat based on 81 SNPs; GRS-WHR324 Genetic Risk Score for Waist Hip Ratio based on 324 SNPs; GRS-BMI565, Genetic Risk Score for Body Mass Index based on 565 SNPs; IVW, Inverse Weighted Median; SBP, Systolic Blood Pressure.

Table S8 Association with hypertension prevalence in MDC, after stratification for age

|                        | Age groups*                 | OR (95%CI)        | p-value             |
|------------------------|-----------------------------|-------------------|---------------------|
| GRS-BMI <sub>565</sub> | 1 <sup>st</sup> tertile age | 1.81 (1.49,2.21)  | 3.14E-9             |
|                        | 2 <sup>nd</sup> tertile age | 1.64 (1.34,2.01)  | 1.45E-6             |
|                        | 3 <sup>rd</sup> tertile age | 1.52 (1.19,1.93)  | .0006               |
| GRS-WHR <sub>324</sub> | 1 <sup>st</sup> tertile age | 2.12 (1.06,4.28)  | 0.034               |
|                        | 2 <sup>nd</sup> tertile age | 3.35 (1.62,6.90)  | 0.001               |
|                        | 3 <sup>rd</sup> tertile age | 6.50 (2.70,15.50) | 2.48E <sup>-5</sup> |
| GRS-BF <sub>81</sub>   | 1 <sup>st</sup> tertile age | 2.51 (1.34,4.70)  | 0.004               |
|                        | 2 <sup>nd</sup> tertile age | 1.41 (0.73,2.73)  | 0.304               |
|                        | 3 <sup>rd</sup> tertile age | 1.27 (0.59,2.76)  | 0.541               |
| GRS-VAT <sub>208</sub> | 1 <sup>st</sup> tertile age | 1.59 (1.20,2.12)  | 0.001               |
|                        | 2 <sup>nd</sup> tertile age | 1.81 (1.34,2.43)  | 8.61E-5             |
|                        | 3 <sup>rd</sup> tertile age | 1.88 (1.33,2.65)  | 0.0004              |

Legend: GRS-VAT208, Genetic risk score for Visceral Adipose Tissue based on 208 SNPs; GRS-BF81, Genetic risk score for Body Fat based on 81 SNPs; GRS-WHR324 Genetic Risk Score for Waist Hip Ratio based on 324 SNPs; GRS-BMI565, Genetic Risk Score for Body Mass Index based on 565 SNPs; OR Odd Ratio; CI; Confidence Interval. \* 1<sup>st</sup> tertile: from 44.9 to 53.3 years; 2<sup>nd</sup> tertile: from 53.3 to 62.0 years; 3<sup>rd</sup> tertile: from 62.0 to 73.6 years.

## Supplementary Figures

Figure S1 Association of the four GRSs with the adiposity traits, in the two cohorts

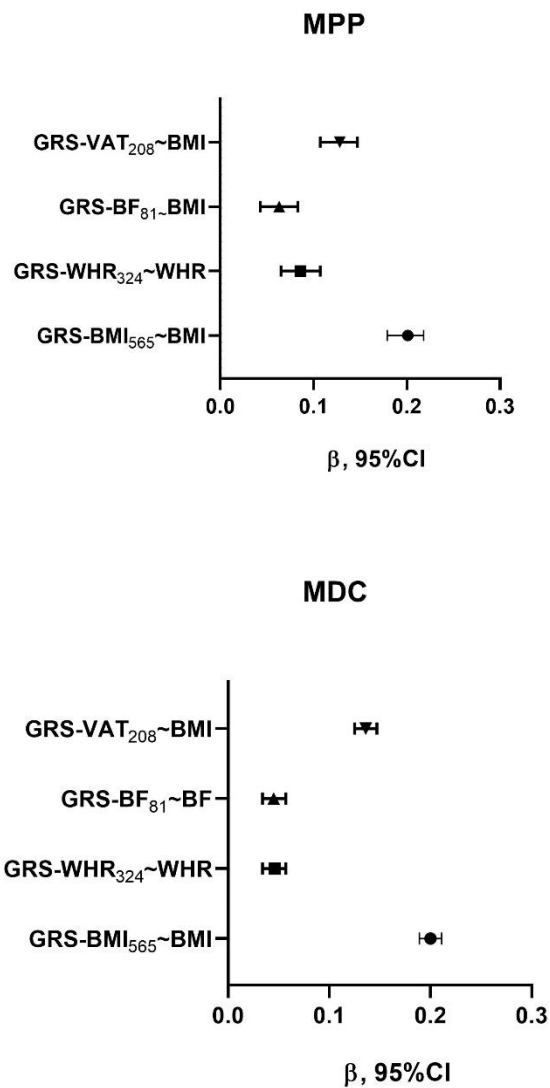

Legend: GRS-VAT208, Genetic risk score for Visceral Adipose Tissue based on 208 SNPs; GRS-BF81, Genetic risk score for Body Fat based on 81 SNPs; GRS-WHR324 Genetic Risk Score for Waist Hip Ratio based on 324 SNPs; GRS-BMI565, Genetic Risk Score for Body Mass Index based on 565 SNPs; BMI, Body Mass Index; BF, Body Fat; WHR, Waist Hip Ratio. The Forest plot shows the magnitude of the association of 1 SD of the different GRS with the correspondent adiposity trait in the Malmö Preventive Project (MPP) and in the Malmö Diet and Cancer (MDC). I.e. for each SD increase in GRS-VAT208 there is a 0.128 Kg/m<sup>2</sup> increase in BMI.



Figure S2 Comparison of different summarized-level data methods in the association of GRS-BMI<sub>565</sub> with SBP (a.) and DBP (b.)

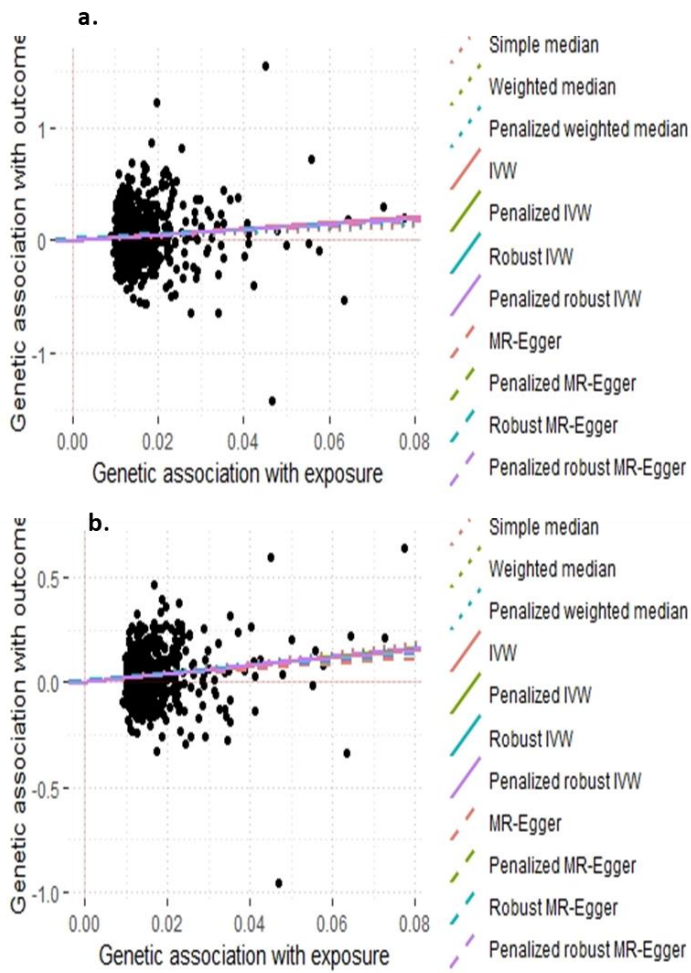

Figure S3 Comparison of different summarized-level data methods in the association of GRS-WHR324 with SBP (a.) and DBP (b.)

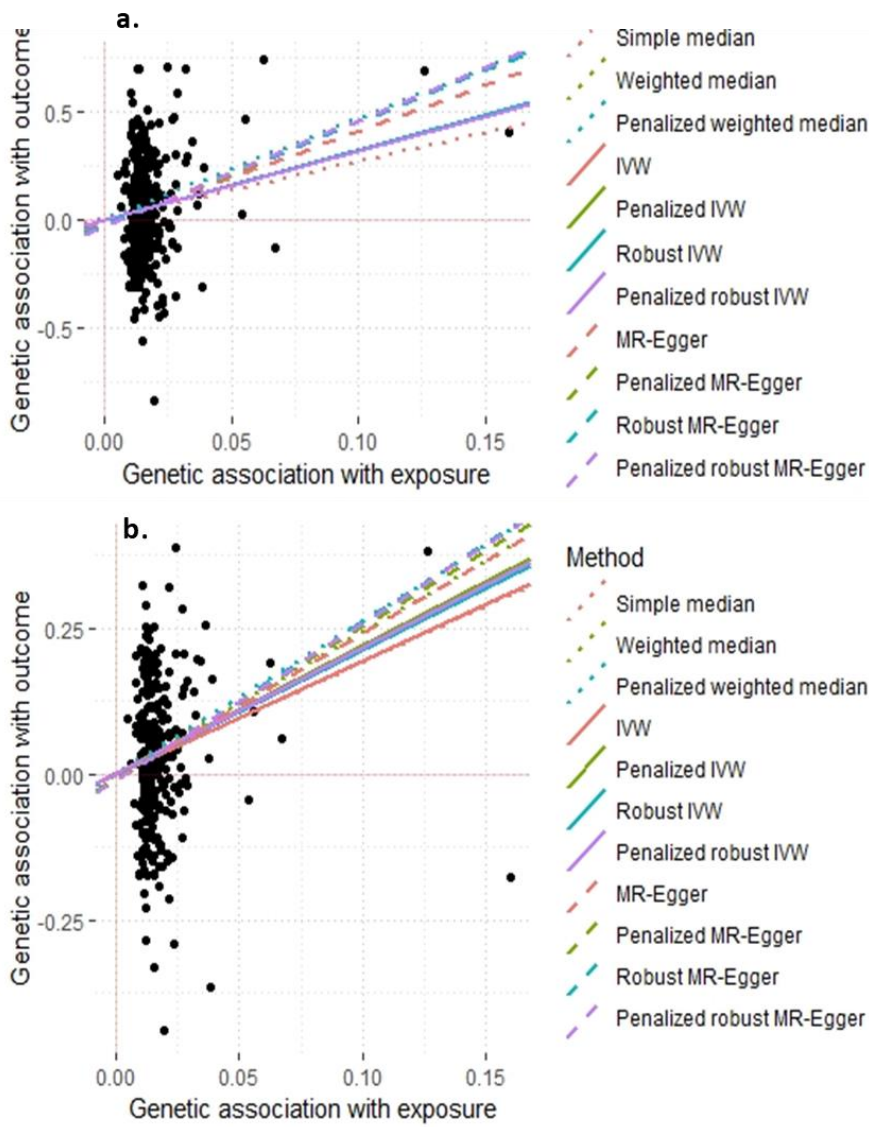

Figure S4 Comparison of different summarized-level data methods in the association of GRS-BF81 with SBP (a.) and DBP (b.)

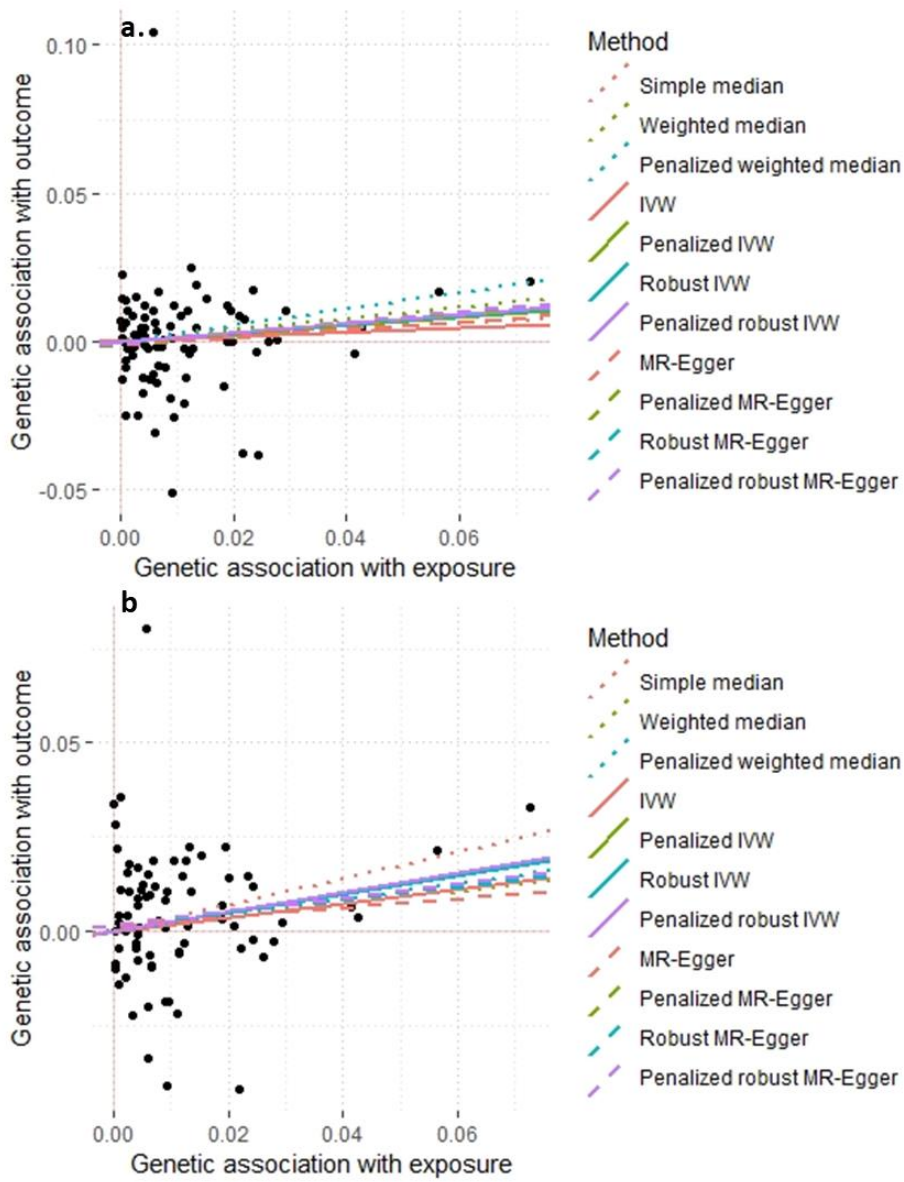

Figure S5 Comparison of different summarized-level data methods in the association of GRS-VAT208 with SBP (a.) and DBP (b.)

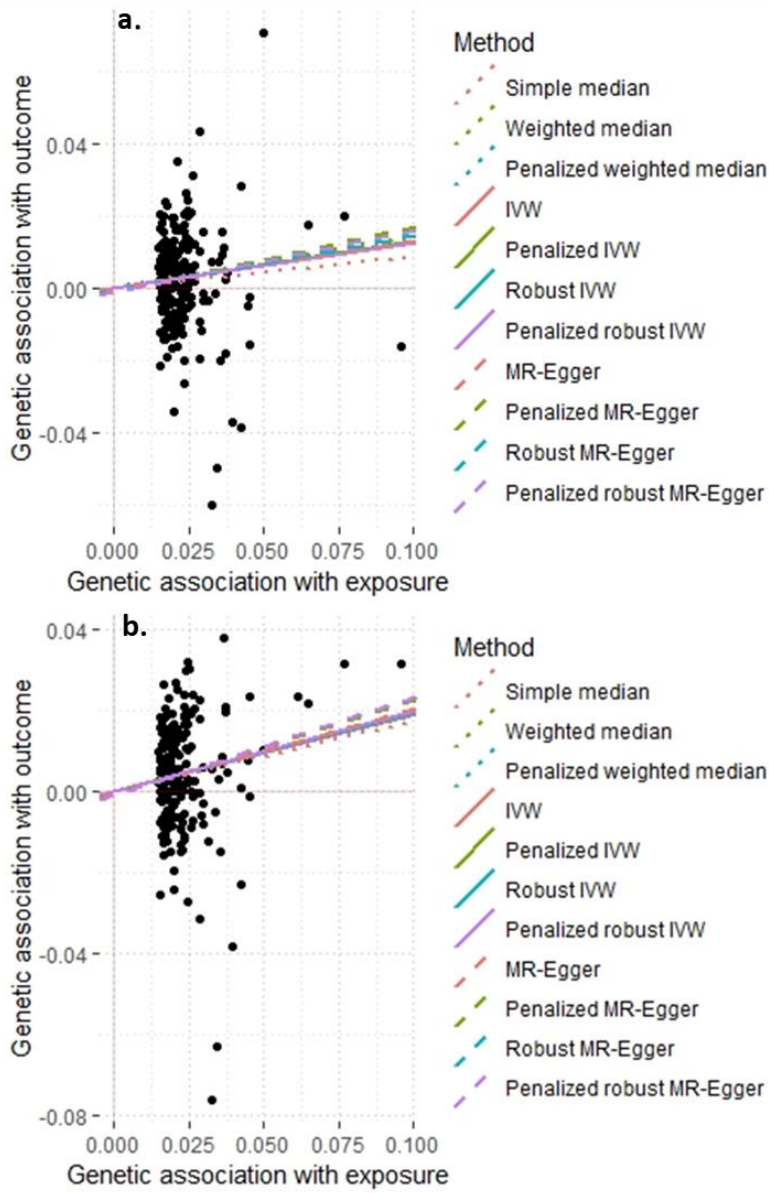

Figure S6 Association of the four GRSs with the prevalence of hypertension in the MDC after stratification for age.

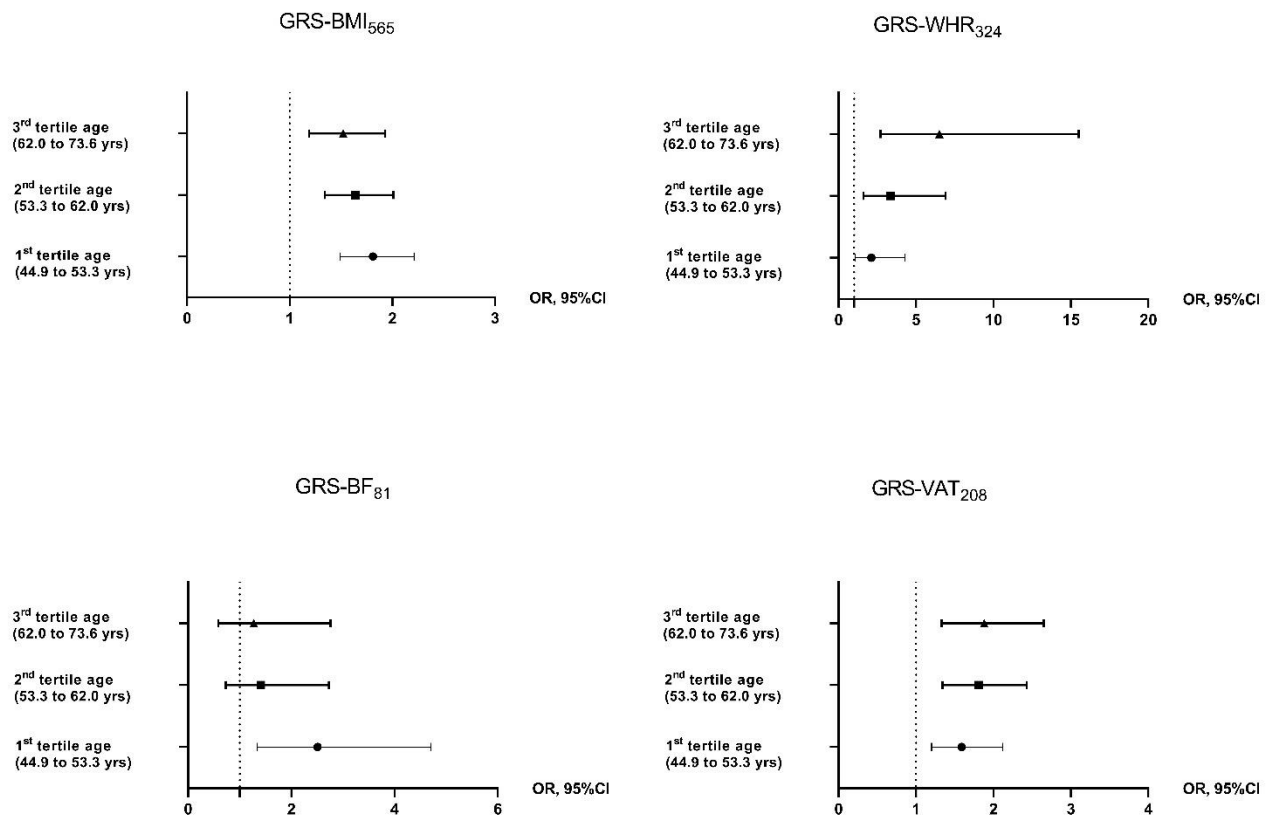

Legend: GRS-VAT208, Genetic risk score for Visceral Adipose Tissue based on 208 SNPs; GRS-BF81, Genetic risk score for Body Fat based on 81 SNPs; GRS-WHR324 Genetic Risk Score for Waist Hip Ratio based on 324 SNPs; GRS-BMI565, Genetic Risk Score for Body Mass Index based on 565 SNPs; BMI, Body Mass Index; BF, Body Fat; WHR, Waist Hip Ratio. The Forest plot shows the magnitude of the association of 1 SD of the different GRS with the correspondent adiposity trait in the Malmö Diet and Cancer (MDC). I.e. for each SD increase in GRS-VAT208 there is a 0.128 Kg/m<sup>2</sup> increase in BMI.
